# Supplementary material
Source: publisher site journal article supplement (https://www.dovepress.com/article/114154)
Supplement: Supplementary file 1 [file get_supplementary_file.php]

## Supplementary material

### HAND GRIP STRENGTH IS ASSOCIATED WITH FEV1 AMONG SUBJECTS WITH COPD

- REPORT FROM A POPULATION BASED COHORT STUDY

Viktor Johansson Strandkvist, PT, MSc, Helena Backman, PhD, Jenny Röding, PT, PhD, Caroline Stridsman, RN, PhD, Anne Lindberg, MD, PhD.

Table S1. Comparing hand grip strength among Non-COPD and subjects with COPD GOLD 1, GOLD 2 and GOLD 3-4, respectively

|       | Non-COPD      | GOLD 1        | p-value <sup>a</sup> | GOLD 2        | p-value <sup>a</sup> | GOLD 3-4      | p-value <sup>a</sup> |
|-------|---------------|---------------|----------------------|---------------|----------------------|---------------|----------------------|
|       | Mean (SD) HGS | Mean (SD) HGS |                      | Mean (SD) HGS |                      | Mean (SD) HGS |                      |
|       | <i>n=255</i>  | <i>n=102</i>  |                      | <i>n=86</i>   |                      | <i>n=7</i>    |                      |
| Women | 26.9 (6.7)    | 25.9 (6.0)    | 0.174                | 26.0 (5.9)    | 0.244                | 21.4 (2.7)    | <b>0.001</b>         |
|       | <i>n=315</i>  | <i>n=92</i>   |                      | <i>n=132</i>  |                      | <i>n=22</i>   |                      |
| Men   | 46.3 (10.5)   | 47.7 (9.1)    | 0.241                | 45.4 (10.3)   | 0.422                | 41.5 (9.7)    | <b>0.038</b>         |

<sup>a</sup>GOLD grade compared with non-COPD  
HGS=Hand Grip Strength  
P-values<0.05 in bold

Table S2. Comparing hand grip strength among normal lung function<sup>1</sup> (NFL) and subjects with COPD GOLD 1, GOLD 2 and GOLD 3-4, respectively

|       | NLF <sup>a</sup> | GOLD 1        | p-value <sup>b</sup> | GOLD 2        | p-value <sup>b</sup> | GOLD 3-4      | p-value <sup>b</sup> |
|-------|------------------|---------------|----------------------|---------------|----------------------|---------------|----------------------|
|       | Mean (SD) HGS    | Mean (SD) HGS |                      | Mean (SD) HGS |                      | Mean (SD) HGS |                      |
|       | <i>n=221</i>     | <i>n=102</i>  |                      | <i>n=86</i>   |                      | <i>n=7</i>    |                      |
| Women | 27.0 (6.8)       | 25.9 (6.0)    | 0.154                | 26.0 (5.9)    | 0.217                | 21.4 (2.7)    | <b>0.001</b>         |
|       | <i>n=250</i>     | <i>n=92</i>   |                      | <i>n=132</i>  |                      | <i>n=22</i>   |                      |
| Men   | 47.4 (10.3)      | 47.7 (9.1)    | 0.785                | 45.4 (10.3)   | 0.077                | 41.5 (9.7)    | <b>0.010</b>         |

<sup>a</sup> Normal Lung Function (subjects with restrictive pattern excluded from the non-COPD group)

<sup>b</sup>GOLD grade compared with NFL  
HGS=Hand Grip Strength  
P-values<0.05 in bold

Table S3. Adjusted analyses of the association between hand grip strength and GOLD grades compared to non-COPD

|          | Women |                 |              | Men   |                |         | Total study population |                 |              |
|----------|-------|-----------------|--------------|-------|----------------|---------|------------------------|-----------------|--------------|
|          | B     | 95% CI          | p-value      | B     | 95% CI         | p-value | B                      | 95% CI          | p-value      |
| Non-COPD | Ref.  |                 |              | Ref.  |                |         | Ref.                   |                 |              |
| GOLD 1   | -0.94 | (-2.17 – 0.30)  | 0.138        | 0.49  | (-1.38 – 2.36) | 0.609   | -0.12                  | (-1.29 – 1.05)  | 0.837        |
| GOLD 2   | -1.11 | (-2.45 – 0.23)  | 0.104        | -1.33 | (-3.00 – 0.35) | 0.120   | -1.07                  | (-2.22 – 0.07)  | 0.067        |
| GOLD 3-4 | -4.90 | (-8.81 – -0.99) | <b>0.014</b> | -3.19 | (-6.75 – 0.37) | 0.079   | -4.18                  | (-6.89 – -1.48) | <b>0.002</b> |

B=Beta coefficient from multiple linear regression models with HGS as dependent variable, adjusted for age, height, heart disease, smoking habits and among all subjects also adjusted for sex  
 95% CI= 95 % confidence interval, p-values<0.05 in bold
